# Supplementary material for: Inoculation with the pH Lowering Plant Growth Promoting Bacterium Bacillus sp. ZV6 Enhances Ni Phytoextraction by Salix alba from a Ni-Polluted Soil Receiving Effluents from Ni Electroplating Industry
Source: MDPI journal article supplement (doi:10.3390/su14126975), 2022-06-07
Supplement: s1 [file s1]

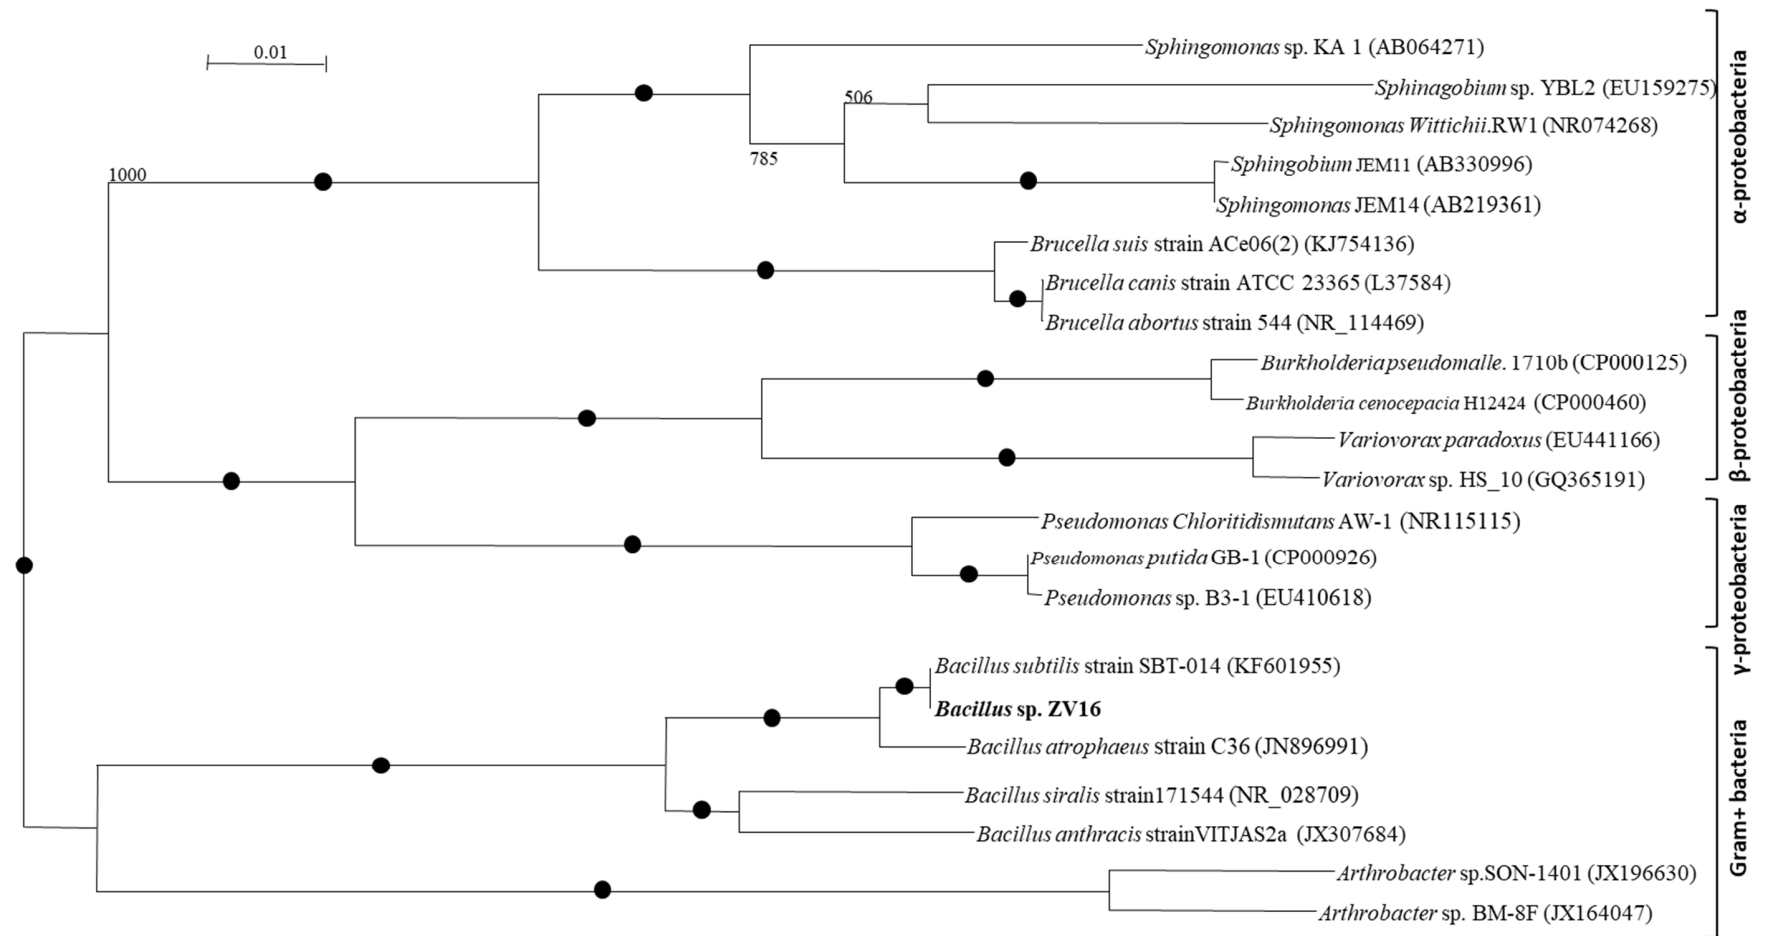

**Supplimentary Figure S1.** Neighbour joining phylogenetic tree of *Bacillus* sp. ZV16.

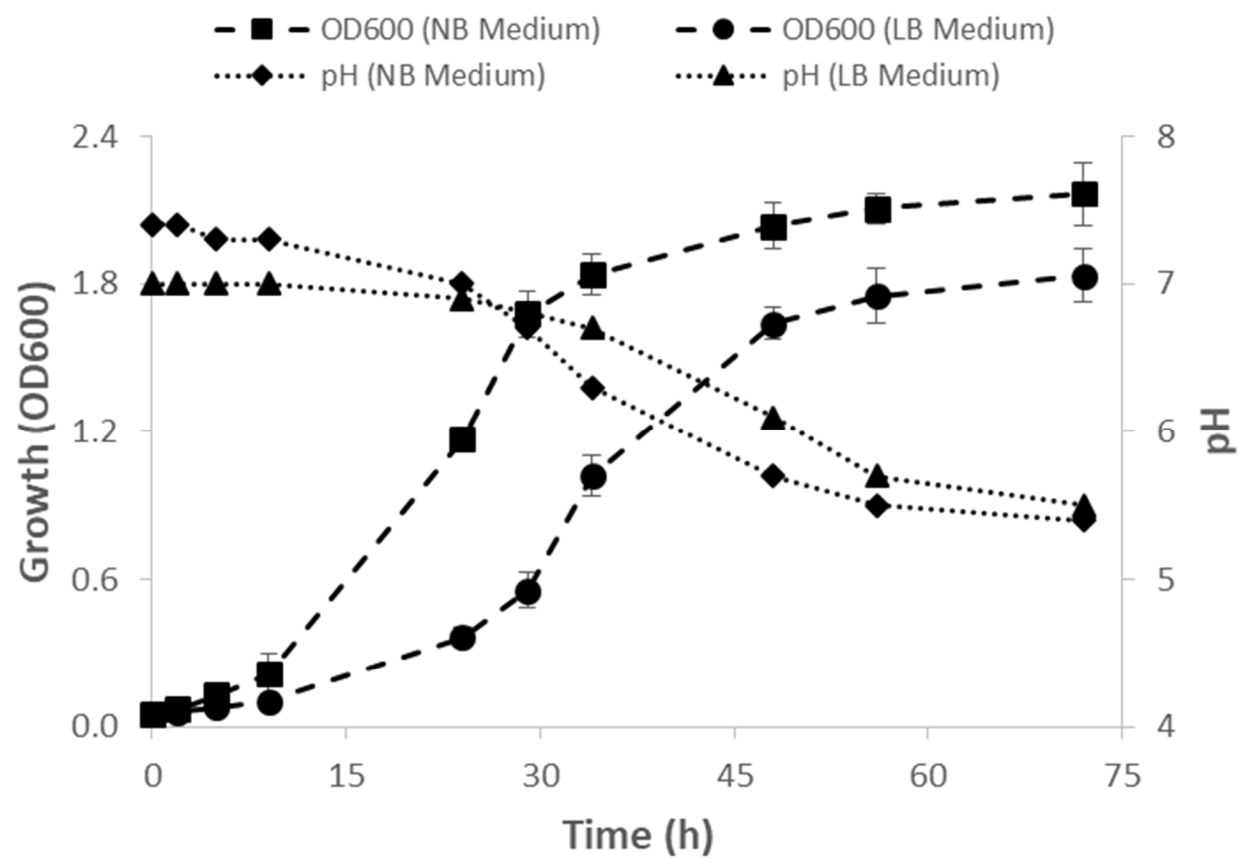

**Supplementary Figure S2.** Growth of *Bacillus* sp. ZV16 in Nutrient Broth and LB broth media, and its impact on pH.

**Supplementary Table S1.** Properties of leaf manure (LM) and animal manure (AM).

| Properties                 | Leaf Manure (LM) |                                    | Animal Manure (AM) |                                    |
|----------------------------|------------------|------------------------------------|--------------------|------------------------------------|
|                            | Values           | Units                              | Values             | Units                              |
| <b>Organic carbon (OC)</b> | 4.82             | %                                  | 3.17               | %                                  |
| <b>Total N</b>             | 1.31             | %                                  | 0.88               | %                                  |
| <b>Total P</b>             | 0.58             | %                                  | 0.22               | %                                  |
| <b>Total K</b>             | 1.68             | %                                  | 0.97               | %                                  |
| <b>OM</b>                  | 8.31             | %                                  | 5.41               | %                                  |
| <b>Total sulfur</b>        | 0.47             | %                                  | 0.21               | %                                  |
| <b>Fe</b>                  | 3820             | mg kg <sup>-1</sup>                | 1237               | mg kg <sup>-1</sup>                |
| <b>Zn</b>                  | 703              | mg kg <sup>-1</sup>                | 345                | mg kg <sup>-1</sup>                |
| <b>Mn</b>                  | 1631             | mg kg <sup>-1</sup>                | 487                | mg kg <sup>-1</sup>                |
| <b>Cu</b>                  | 31.2             | mg kg <sup>-1</sup>                | 7.2                | mg kg <sup>-1</sup>                |
| <b>Na</b>                  | 0.29             | mg kg <sup>-1</sup>                | 0.14               | mg kg <sup>-1</sup>                |
| <b>Ca</b>                  | 5.26             | %                                  | 1.13               | %                                  |
| <b>Mg</b>                  | 0.67             | %                                  | 0.19               | %                                  |
| <b>pH (H<sub>2</sub>O)</b> | 8.2              | –                                  | 8.0                | –                                  |
| <b>EC</b>                  | 2.31             | dS m <sup>-1</sup>                 | 1.05               | dS m <sup>-1</sup>                 |
| <b>CEC</b>                 | 6.13             | cmol <sub>c</sub> kg <sup>-1</sup> | 2.24               | Cmol <sub>c</sub> kg <sup>-1</sup> |
